# Supplementary material for: Optimizing growth factor induction of tenogenesis in three-dimensional culture of mesenchymal stem cells
Source: PubMed Central journal article supplement — J Tissue Eng. 2019 May 22;10:2041731419848776. doi: 10.1177/2041731419848776 (PMC6535701; doi:10.1177/2041731419848776), 2019-05-22
Supplement: Supplemental_Table_1_(1).pdf [file Supplemental_Table_1_%281%29.pdf]

Supplemental Table 1. Group-wise differences ( $p$ -values) in contraction on day 1

| Day 1                | Control | FGF-2 | TGF- $\beta$ 1 | IGF-1 | BMP-12 | BMP-12<br>IGF-1 | TGF- $\beta$ 1<br>IGF-1 | BMP-12<br>FGF-2 |
|----------------------|---------|-------|----------------|-------|--------|-----------------|-------------------------|-----------------|
| Control              | -       | 0.662 | 0.295          | 0.307 | 0.59   | 0.797           | 0.505                   | 0.078           |
| FGF-2                | 0.662   | -     | 0.142          | 0.148 | 0.918  | 0.857           | 0.817                   | 0.178           |
| TGF- $\beta$ 1       | 0.295   | 0.142 | -              | 0.979 | 0.117  | 0.195           | 0.091                   | 0.006           |
| IGF-1                | 0.307   | 0.148 | 0.979          | -     | 0.123  | 0.203           | 0.096                   | 0.007           |
| BMP-12               | 0.59    | 0.918 | 0.117          | 0.123 | -      | 0.777           | 0.897                   | 0.212           |
| BMP-12/IGF-1         | 0.797   | 0.857 | 0.195          | 0.203 | 0.777  | -               | 0.681                   | 0.129           |
| TGF- $\beta$ 1/IGF-1 | 0.505   | 0.817 | 0.091          | 0.096 | 0.897  | 0.681           | -                       | 0.262           |
| BMP-12/FGF-2         | 0.078   | 0.178 | 0.006          | 0.007 | 0.212  | 0.129           | 0.262                   | -               |
