# Supplementary material for: Optimizing growth factor induction of tenogenesis in three-dimensional culture of mesenchymal stem cells
Source: PubMed Central journal article supplement — J Tissue Eng. 2019 May 22;10:2041731419848776. doi: 10.1177/2041731419848776 (PMC6535701; doi:10.1177/2041731419848776), 2019-05-22
Supplement: Supplemental_Table_2.pdf [file Supplemental_Table_2.pdf]

Supplemental Table 2. Group-wise differences ( $p$ -values) in contraction on day 3

| Day 3                                | Control | FGF-2 | TGF- $\beta$ 1 | IGF-1 | BMP-12 | BMP-12<br>IGF-1 | TGF- $\beta$ 1<br>IGF-1 | BMP-12<br>FGF-2 |
|--------------------------------------|---------|-------|----------------|-------|--------|-----------------|-------------------------|-----------------|
| <b>Control</b>                       | -       | 0.783 | 0.543          | 0.953 | 0.753  | 0.68            | 0.157                   | 0.005           |
| <b>FGF-2</b>                         | 0.783   | -     | 0.738          | 0.829 | 0.556  | 0.493           | 0.093                   | 0.011           |
| <b>TGF-<math>\beta</math>1</b>       | 0.543   | 0.738 | -              | 0.583 | 0.358  | 0.31            | 0.046                   | 0.025           |
| <b>IGF-1</b>                         | 0.953   | 0.829 | 0.583          | -     | 0.709  | 0.68            | 0.141                   | 0.006           |
| <b>BMP-12</b>                        | 0.753   | 0.556 | 0.358          | 0.709 | -      | 0.921           | 0.266                   | 0.002           |
| <b>BMP-12/IGF-1</b>                  | 0.68    | 0.493 | 0.31           | 0.68  | 0.921  | -               | 0.31                    | 0.001           |
| <b>TGF-<math>\beta</math>1/IGF-1</b> | 0.157   | 0.093 | 0.046          | 0.141 | 0.266  | 0.31            | -                       | <0.001          |
| <b>BMP-12/FGF-2</b>                  | 0.005   | 0.011 | 0.025          | 0.006 | 0.002  | 0.001           | <0.001                  | -               |
