# Supplementary material for: Optimizing growth factor induction of tenogenesis in three-dimensional culture of mesenchymal stem cells
Source: PubMed Central journal article supplement — J Tissue Eng. 2019 May 22;10:2041731419848776. doi: 10.1177/2041731419848776 (PMC6535701; doi:10.1177/2041731419848776), 2019-05-22
Supplement: Supplemental_Table_3.pdf [file Supplemental_Table_3.pdf]

Supplemental Table 3. Group-wise differences ( $p$ -values) in contraction on day 5

| Day 5                                | Control      | FGF-2        | TGF- $\beta$ 1 | IGF-1 | BMP-12       | BMP-12<br>IGF-1 | TGF- $\beta$ 1<br>IGF-1 | BMP-12<br>FGF-2 |
|--------------------------------------|--------------|--------------|----------------|-------|--------------|-----------------|-------------------------|-----------------|
| <b>Control</b>                       | -            | 0.702        | 0.093          | 0.314 | 0.669        | 0.605           | 0.5                     | <b>0.011</b>    |
| <b>FGF-2</b>                         | 0.702        | -            | 0.189          | 0.529 | 0.419        | 0.37            | 0.293                   | <b>0.027</b>    |
| <b>TGF-<math>\beta</math>1</b>       | 0.093        | 0.189        | -              | 0.486 | <b>0.037</b> | <b>0.03</b>     | <b>0.021</b>            | 0.347           |
| <b>IGF-1</b>                         | 0.314        | 0.529        | 0.486          | -     | 0.155        | 0.131           | 0.097                   | 0.106           |
| <b>BMP-12</b>                        | 0.669        | 0.419        | <b>0.037</b>   | 0.155 | -            | 0.928           | 0.804                   | <b>0.003</b>    |
| <b>BMP-12/IGF-1</b>                  | 0.605        | 0.37         | <b>0.03</b>    | 0.131 | 0.928        | -               | 0.874                   | <b>0.002</b>    |
| <b>TGF-<math>\beta</math>1/IGF-1</b> | 0.5          | 0.293        | <b>0.021</b>   | 0.097 | 0.804        | 0.874           | -                       | <b>0.001</b>    |
| <b>BMP-12/FGF-2</b>                  | <b>0.011</b> | <b>0.027</b> | 0.347          | 0.106 | <b>0.003</b> | <b>0.002</b>    | <b>0.001</b>            | -               |
