# Supplementary material for: Optimizing growth factor induction of tenogenesis in three-dimensional culture of mesenchymal stem cells
Source: PubMed Central journal article supplement — J Tissue Eng. 2019 May 22;10:2041731419848776. doi: 10.1177/2041731419848776 (PMC6535701; doi:10.1177/2041731419848776), 2019-05-22
Supplement: Supplemental_Table_4.pdf [file Supplemental_Table_4.pdf]

Supplemental Table 4. Group-wise differences ( $p$ -values) in contraction on day 7

| Day 7                                | Control      | FGF-2        | TGF- $\beta$ 1 | IGF-1        | BMP-12        | BMP-12<br>IGF-1 | TGF- $\beta$ 1<br>IGF-1 | BMP-12<br>FGF-2   |
|--------------------------------------|--------------|--------------|----------------|--------------|---------------|-----------------|-------------------------|-------------------|
| <b>Control</b>                       | -            | 0.827        | 0.091          | 0.469        | 0.44          | 0.454           | <b>0.03</b>             | <b>0.002</b>      |
| <b>FGF-2</b>                         | 0.827        | -            | 0.058          | 0.347        | 0.578         | 0.595           | 0.0502                  | <b>0.001</b>      |
| <b>TGF-<math>\beta</math>1</b>       | 0.091        | 0.058        | -              | 0.324        | <b>0.016</b>  | <b>0.017</b>    | <b>0.0003</b>           | 0.145             |
| <b>IGF-1</b>                         | 0.469        | 0.347        | 0.324          | -            | 0.139         | 0.145           | <b>0.005</b>            | <b>0.017</b>      |
| <b>BMP-12</b>                        | 0.44         | 0.578        | <b>0.016</b>   | 0.139        | -             | 0.145           | 0.151                   | <b>0.0003</b>     |
| <b>BMP-12/IGF-1</b>                  | 0.454        | 0.595        | <b>0.017</b>   | 0.145        | 0.145         | -               | 0.145                   | <b>0.0003</b>     |
| <b>TGF-<math>\beta</math>1/IGF-1</b> | <b>0.03</b>  | 0.0502       | <b>0.0003</b>  | <b>0.005</b> | 0.151         | 0.145           | -                       | <b>&lt;0.0001</b> |
| <b>BMP-12/FGF-2</b>                  | <b>0.002</b> | <b>0.001</b> | 0.145          | <b>0.017</b> | <b>0.0003</b> | <b>0.0003</b>   | <b>&lt;0.0001</b>       | -                 |
