# Supplementary material for: Optimizing growth factor induction of tenogenesis in three-dimensional culture of mesenchymal stem cells
Source: PubMed Central journal article supplement — J Tissue Eng. 2019 May 22;10:2041731419848776. doi: 10.1177/2041731419848776 (PMC6535701; doi:10.1177/2041731419848776), 2019-05-22
Supplement: Supplemental_Table_5.pdf [file Supplemental_Table_5.pdf]

Supplemental Table 5. Group-wise differences (*p*-values) in contraction on day 10

| Day 10                               | Control | FGF-2  | TGF- $\beta$ 1 | IGF-1 | BMP-12  | BMP-12<br>IGF-1 | TGF- $\beta$ 1<br>IGF-1 | BMP-12<br>FGF-2 |
|--------------------------------------|---------|--------|----------------|-------|---------|-----------------|-------------------------|-----------------|
| <b>Control</b>                       | -       | 0.722  | 0.147          | 0.45  | 0.422   | 0.383           | 0.077                   | 0.0006          |
| <b>FGF-2</b>                         | 0.722   | -      | 0.074          | 0.269 | 0.653   | 0.602           | 0.153                   | 0.0002          |
| <b>TGF-<math>\beta</math>1</b>       | 0.147   | 0.074  | -              | 0.478 | 0.027   | 0.023           | 0.002                   | 0.027           |
| <b>IGF-1</b>                         | 0.45    | 0.269  | 0.478          | -     | 0.123   | 0.108           | 0.014                   | 0.004           |
| <b>BMP-12</b>                        | 0.422   | 0.653  | 0.027          | 0.123 | -       | 0.943           | 0.322                   | <0.0001         |
| <b>BMP-12/IGF-1</b>                  | 0.383   | 0.602  | 0.023          | 0.108 | 0.943   | -               | 0.358                   | <0.0001         |
| <b>TGF-<math>\beta</math>1/IGF-1</b> | 0.077   | 0.153  | 0.002          | 0.014 | 0.322   | 0.358           | -                       | <0.0001         |
| <b>BMP-12/FGF-2</b>                  | 0.0006  | 0.0002 | 0.027          | 0.004 | <0.0001 | <0.0001         | <0.0001                 | -               |
