# Supplementary figures and images for: Optimizing growth factor induction of tenogenesis in three-dimensional culture of mesenchymal stem cells
Source: PubMed Central journal article supplement — J Tissue Eng. 2019 May 22;10:2041731419848776. doi: 10.1177/2041731419848776 (PMC6535701; doi:10.1177/2041731419848776), 2019-05-22

# GEL CONTRACTION

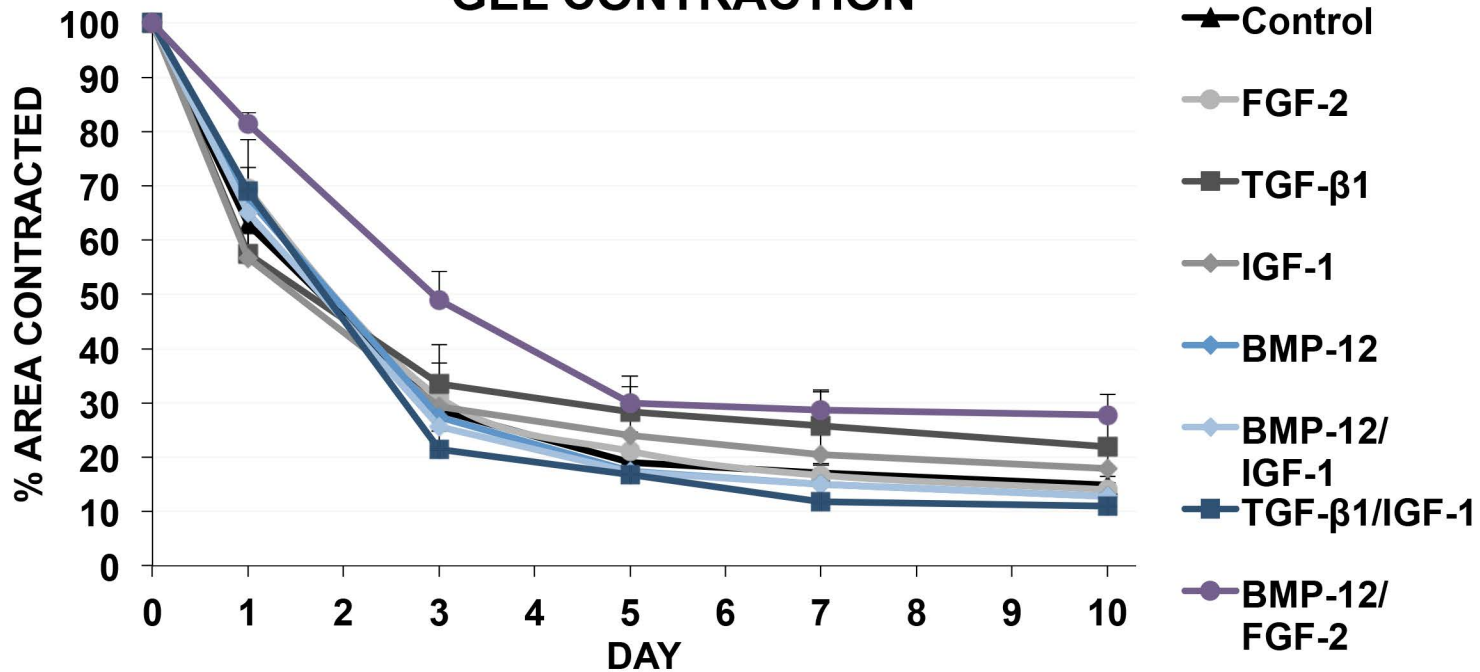

Supplement: Supplementary_Fig_1.pdf [file Supplementary_Fig_1.pdf]
